# Supplementary material for: Molecular characterization of HLA class II binding to the LAG‐3 T cell co‐inhibitory receptor
Source: PubMed Central journal article supplement (PMC8101287; doi:10.1002/eji.202048753), 2020-10-09
Supplement: EJI-51-331-s001.pdf [file EJI-51-331-s001.pdf]

## **Supporting information Figures S1 –S5**

Molecular characterisation of HLA class II binding to the LAG-3 T cell co-inhibitory receptor

### **Authors and Affiliations**

Bruce J. MacLachlan<sup>1</sup>, Georgina H. Mason<sup>1</sup>, Alexander Greenshields-Watson<sup>1</sup>, Frederic Triebel<sup>2</sup>, Awen Gallimore<sup>1</sup>, David K. Cole<sup>1\*</sup> and Andrew Godkin<sup>1\*</sup>

<sup>1</sup>Division of Infection & Immunity, Cardiff University, CF14 4XN, UK.

<sup>2</sup>Immutep S.A.S., 91893 Orsay, France.

\*These authors contributed equally to the study.

To whom correspondence should be addressed: Professor Andrew Godkin, Email: [godkinaj@cardiff.ac.uk](mailto:godkinaj@cardiff.ac.uk), and Dr David K. Cole, E-mail: [coledk@cardiff.ac.uk](mailto:coledk@cardiff.ac.uk).

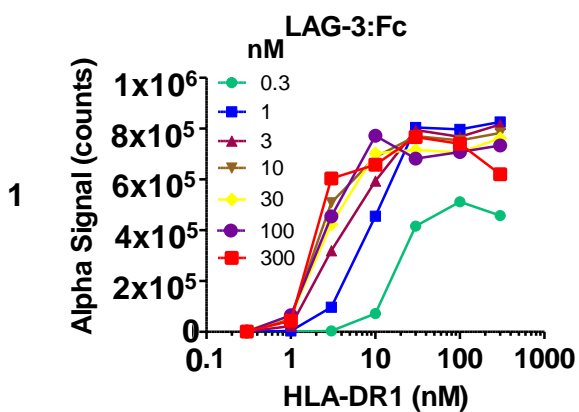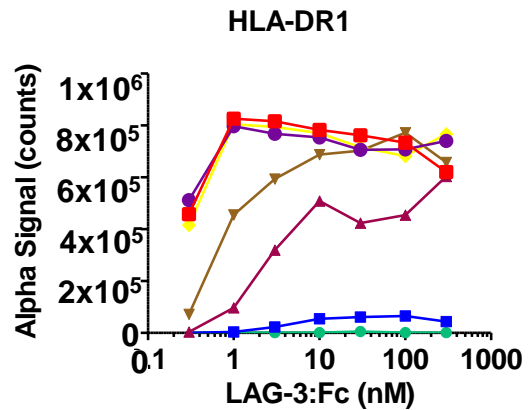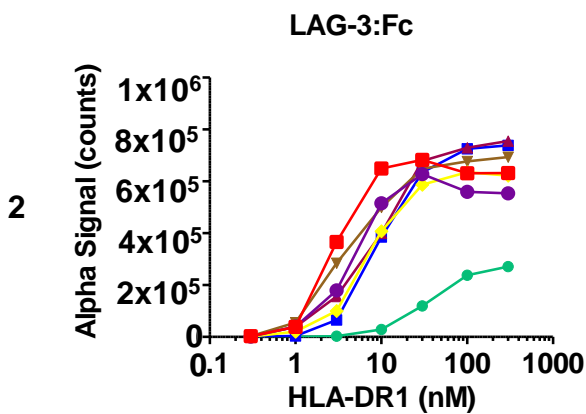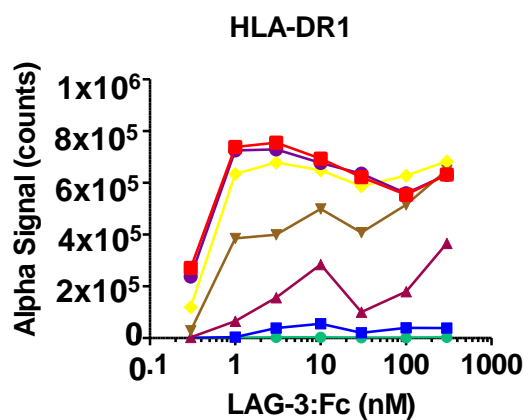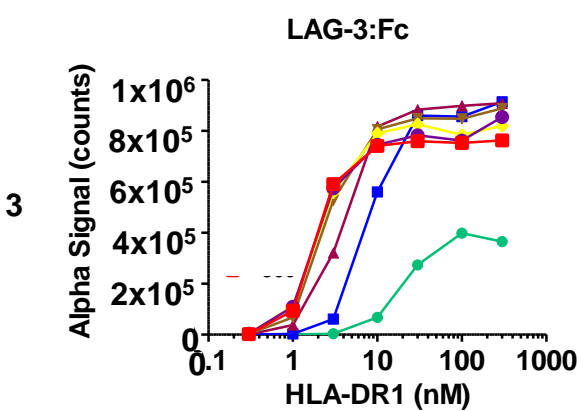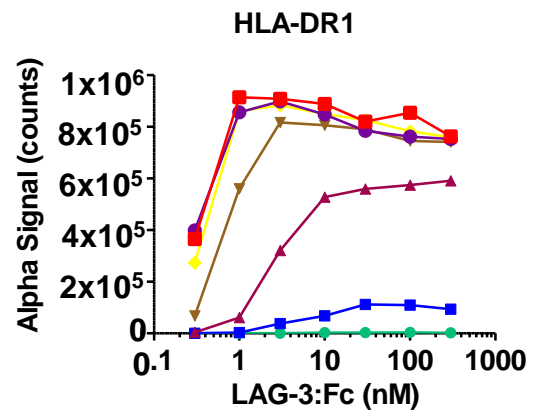

### Supplementary Figure S1 – LAG-3:Fc binding detected to multiple pHLA-II alleles.

Three replicate protein cross titrations (marked 1-3) using LAG-3:Fc and pHLA-DR1 using a 1 in 3 dilution series from 300 nM to 0.3 nM. All assays were performed using Protein A acceptor beads and streptavidin donor beads at a final bead concentration of 20  $\mu\text{g}/\text{mL}$ , in 96 well  $\frac{1}{2}$  area opti plates and analysed using an En-vision plate reader at RT.

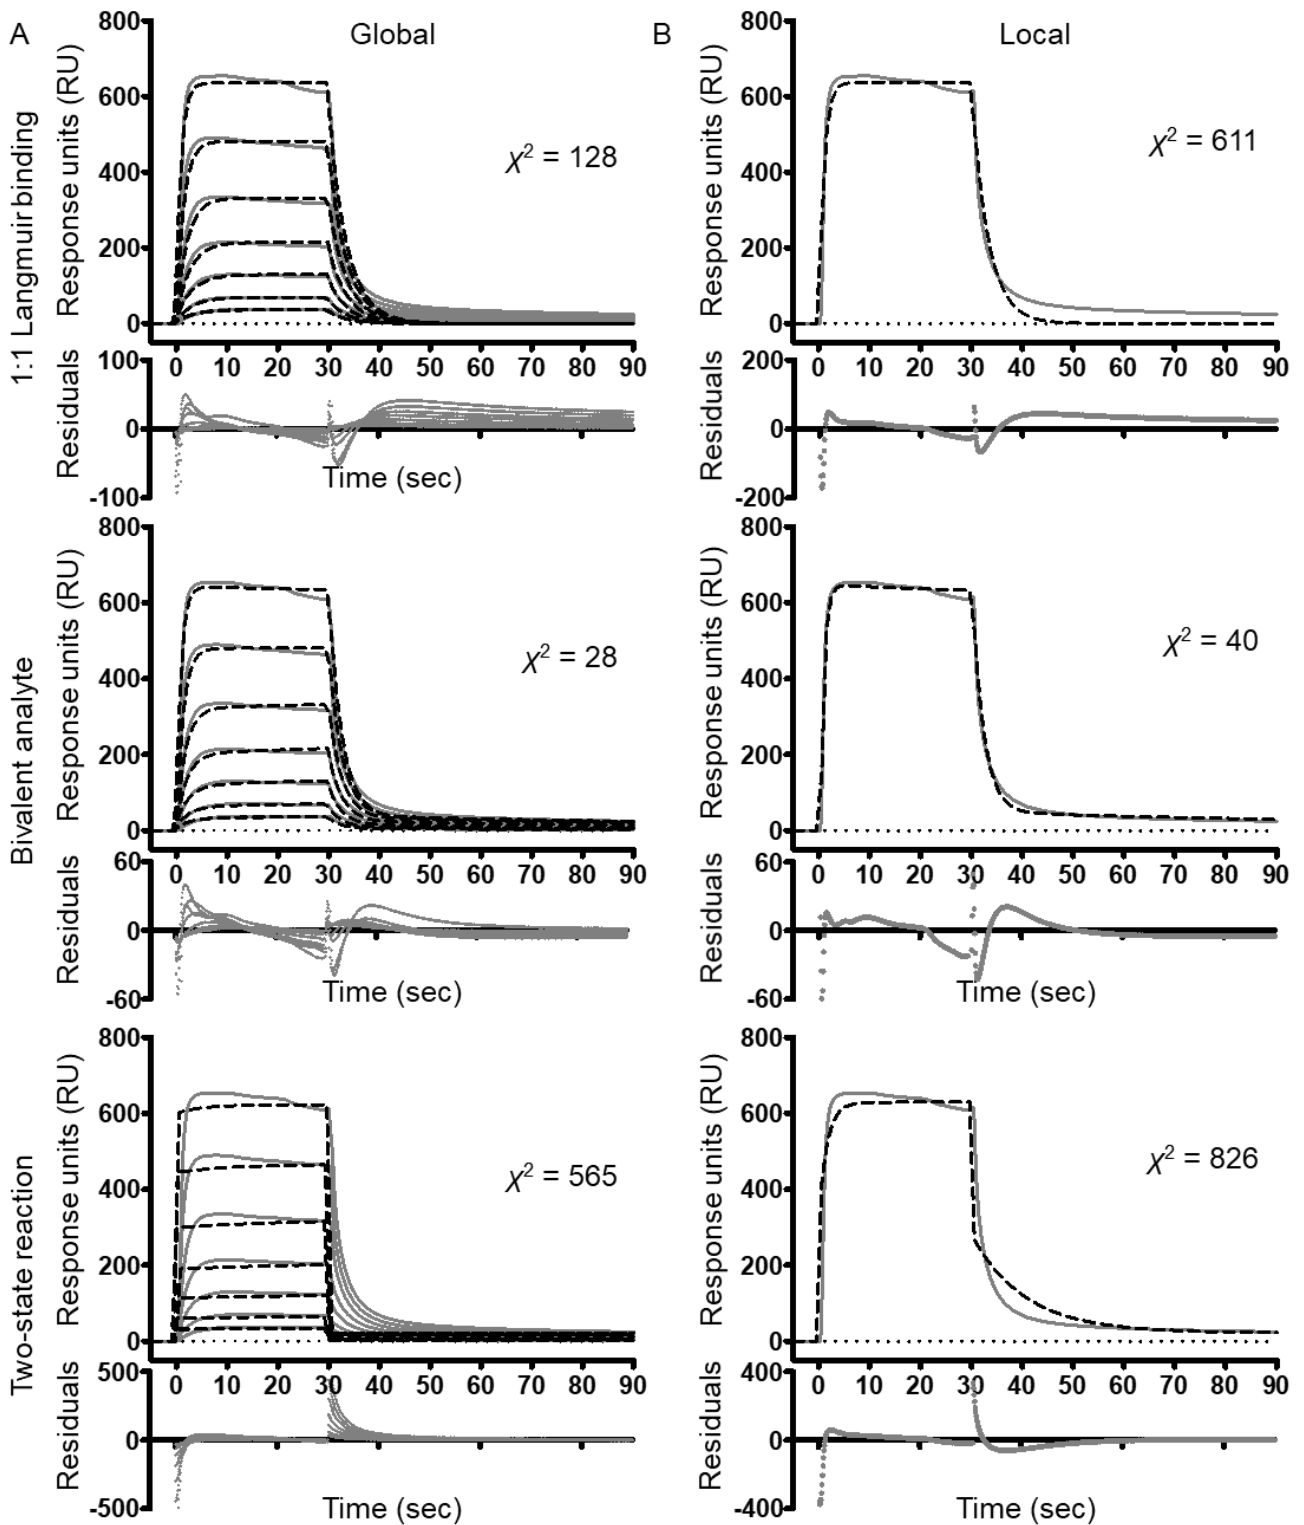

**Supplementary Figure S2 – LAG-3:Fc binding to HLA-DR1 exhibits bivalent analyte kinetics.**

**A)** Global fit analysis of reference subtracted sensograms of LAG-3:Fc (0.1 – 7  $\mu\text{M}$ ) binding to immobilised (525 RU) HLA-DR1 fitted with three candidate models: 1:1 Langmuir binding, bivalent analyte and two-state reaction. Observed sensograms are shown as grey solid lines, fitted curves as black dashed lines with inset  $\chi^2$  value and kinetic derived dissociation affinity constant  $K_D$ . Corresponding curve fit residual plots are shown below each fit. Data are representative of three independent experimental repeats. **B)** Local fit analysis of the reference subtracted sensogram describing LAG-3:Fc binding at 7  $\mu\text{M}$  to immobilised HLA-DR1. Data are representative of three independent experimental repeats.

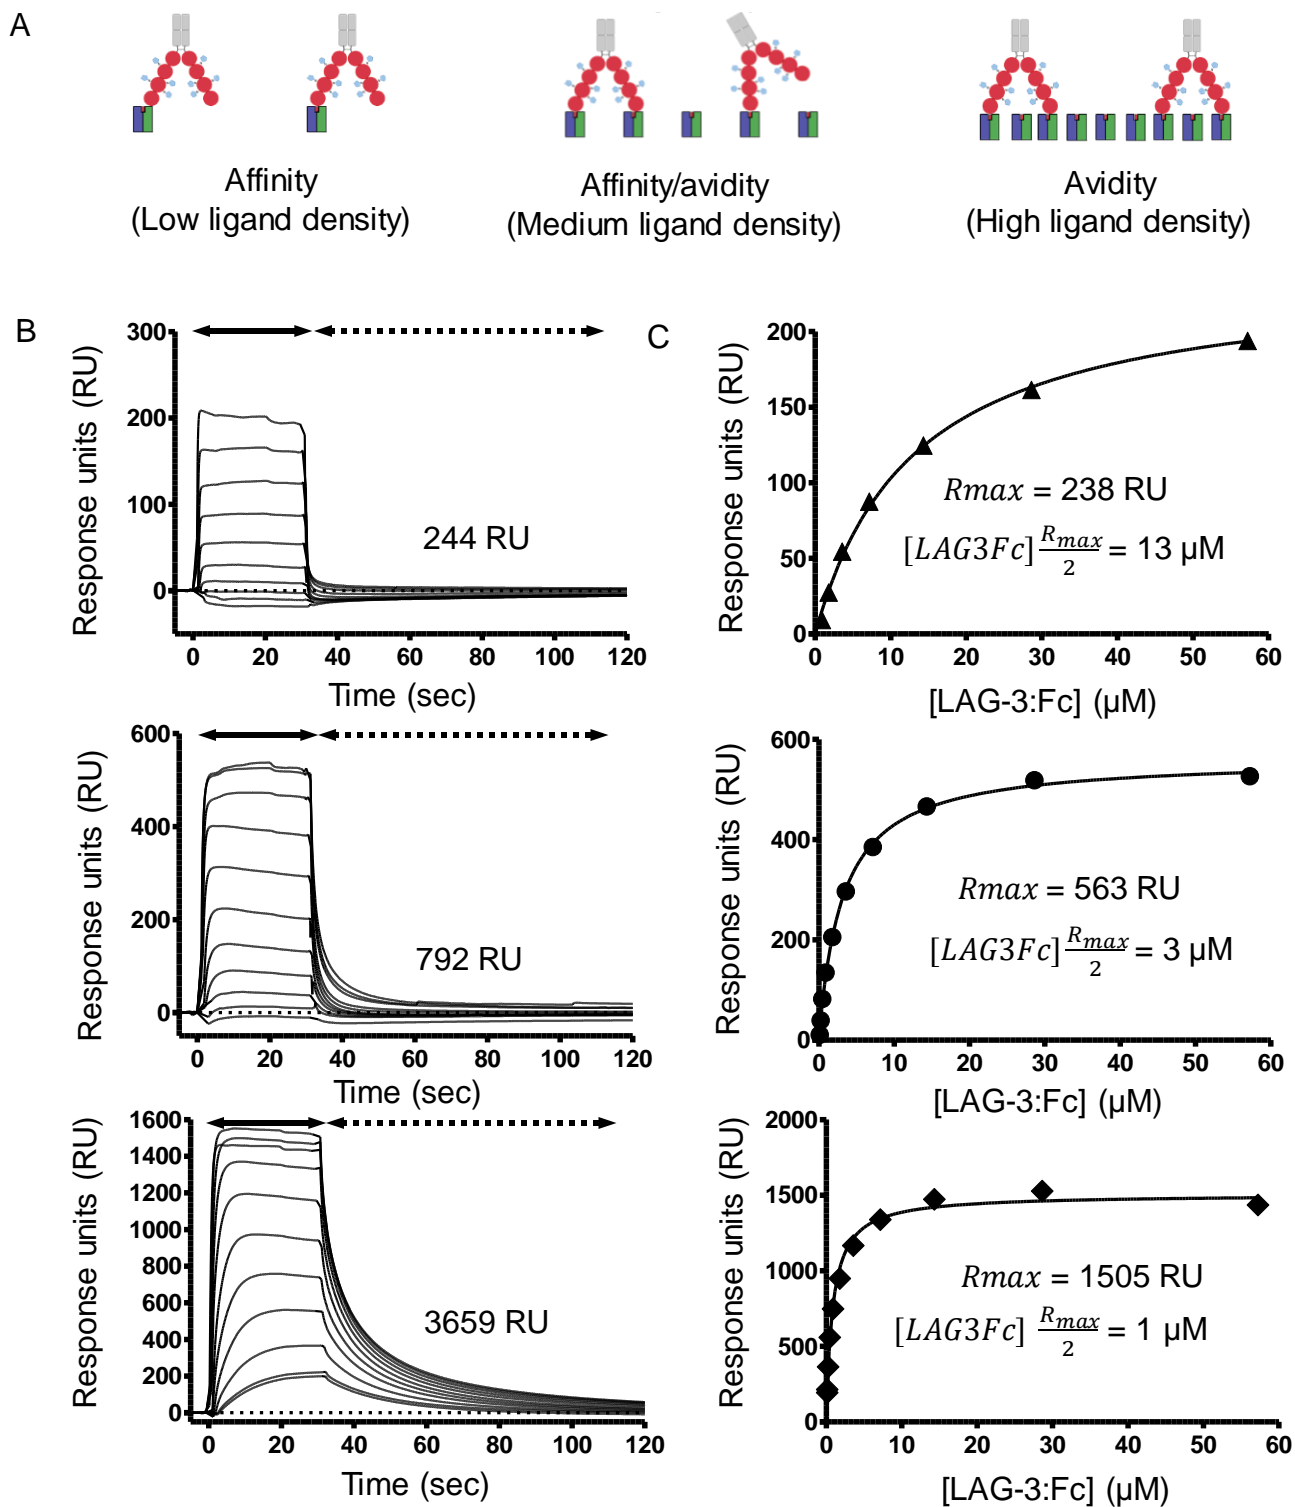

**Supplementary Figure S3– LAG-3 binds HLA-DR1 with micromolar affinity.** **A)** Schematic overview of the effects of increasing concentration of ligand on the observed binding of LAG-3:Fc in SPR experiments. **B)** SPR analysis of LAG-3:Fc binding to HLA-DR1 immobilised at low (244 RU), intermediate (792 RU) and high (3659 RU) ligand concentrations. **C)** Steady-state analysis of LAG-3:Fc binding to HLA-DR1 at varying ligand concentrations analysed from sensograms as shown in **A** by plotting RU increase from baseline during steady-state (25 seconds into injections) against concentration of LAG-3:Fc. Data are representative of three independent experimental repeats.

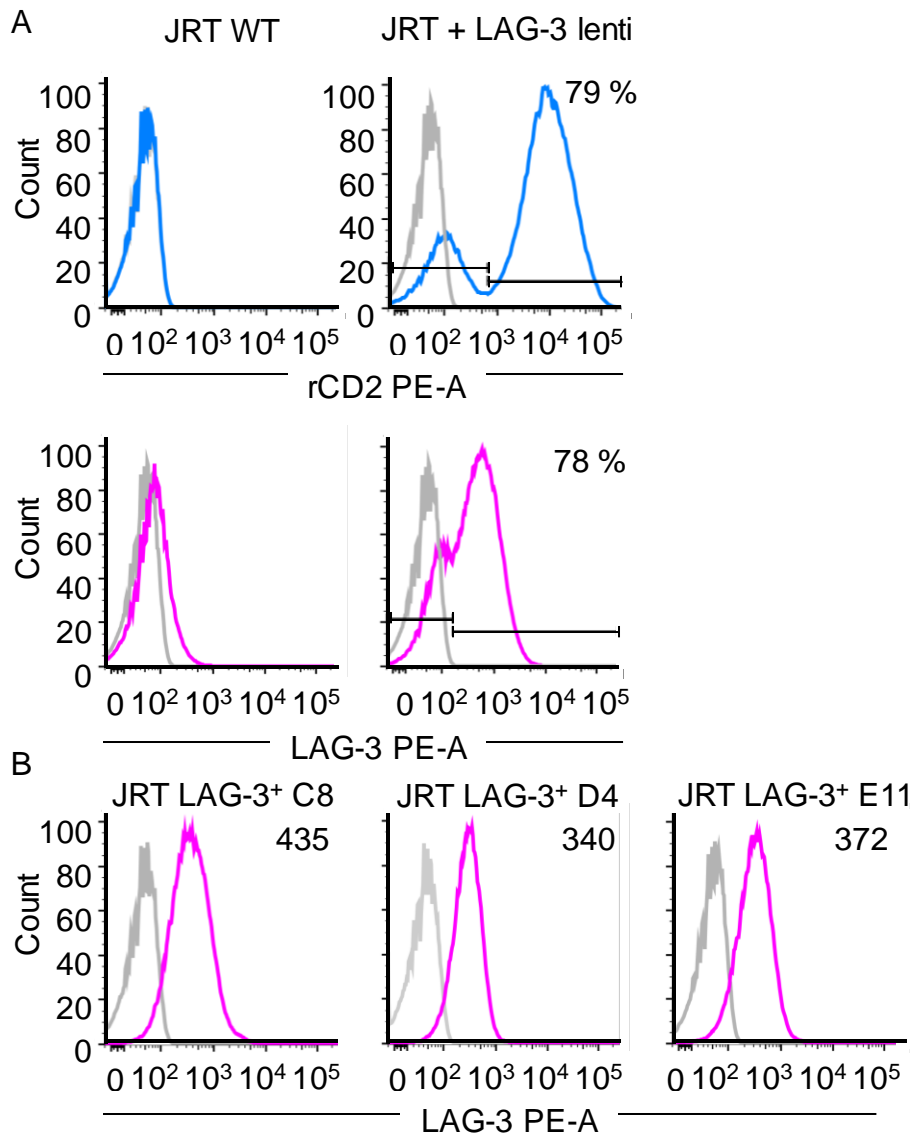

**Supplementary Figure S4 – Formation of the JRT LAG-3<sup>+</sup> C8 cell line via lentiviral delivery.** **A)** Flow cytometry histogram plots of rCD2 and LAG-3 expression in wild type (WT) JRT cells and transduced JRT line following lentiviral delivery (JRT + LAG-3 lenti). rCD2 staining coloured blue, unstained control coloured grey and LAG-3 staining coloured pink. Data are representative of three independent experimental repeats. **B)** Flow cytometry histogram plots of LAG-3 expression in three consequent JRT LAG-3<sup>+</sup> clones C8, D4 & E11 generated from the line described in **A**. Unstained control coloured grey and LAG-3 staining coloured pink. Inset numbers represent gMFI of LAG-3 staining. Data are representative of three independent experimental repeats.

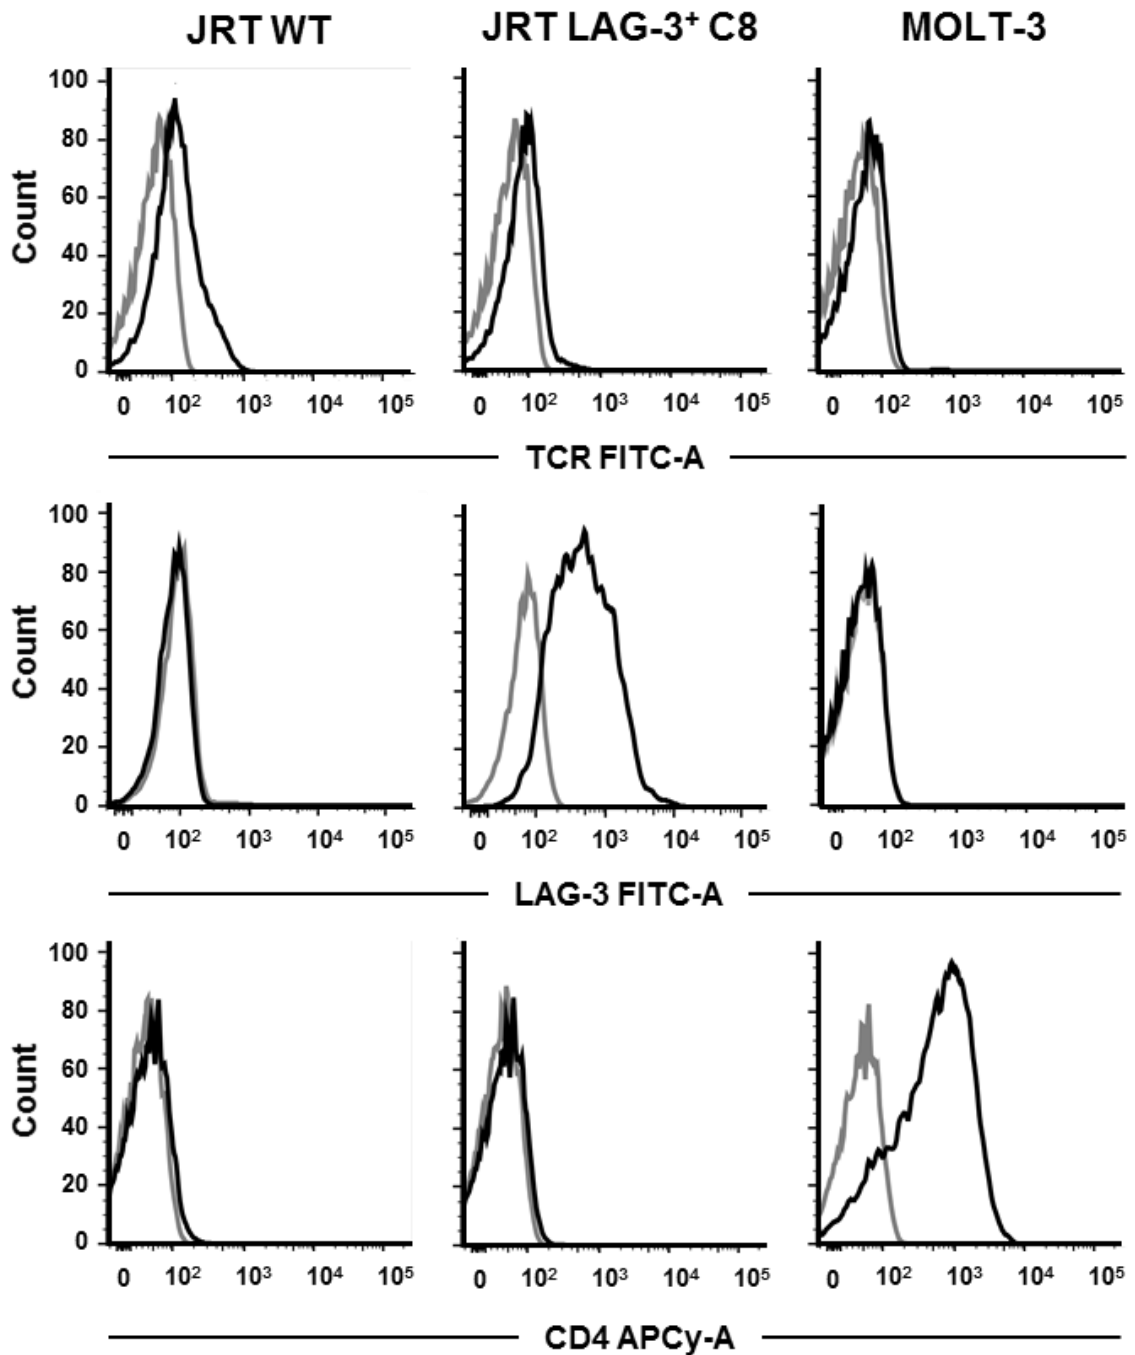

**Supplementary Figure S5 – Surface characterisation of T cell derived cell lines.** Flow cytometry histograms of TCR, LAG-3 and CD4 surface expression on LAG-3- JRT WT, JRT LAG-3+ C8 and MOLT-3 cells. Stained marker = black, FMO/unstained control = grey. Data are representative of three independent experimental repeats.
